# Supplementary material for: Food Intake REstriction for Health OUtcome Support and Education (FIREHOUSE) Protocol: A Randomized Clinical Trial
Source: Int J Environ Res Public Health. 2020 Sep 9;17(18):6569. doi: 10.3390/ijerph17186569 (PMC7559064; doi:10.3390/ijerph17186569)
Supplement: Supplementary file 1 [file ijerph-17-06569-s001.pdf]

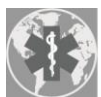

*Supplementary Material*

## Food Intake REstriction for Health OUtcome Support and Education (FIREHOUSE) Protocol: A Randomized Clinical Trial

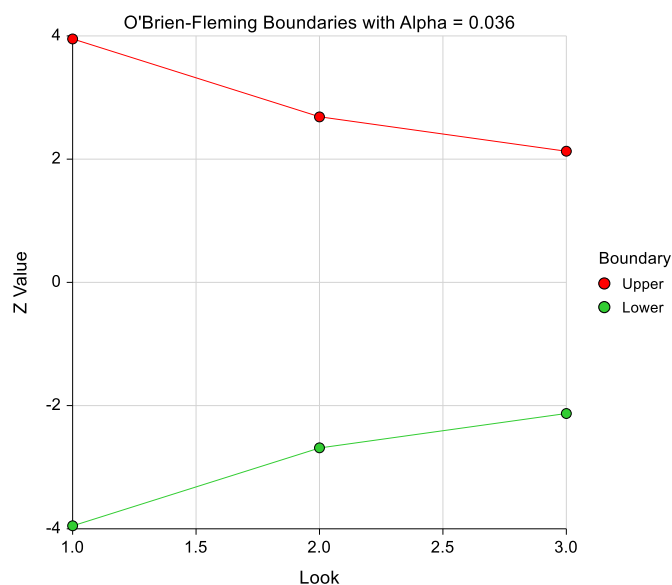

**Figure 1.** Interim Monitoring Bounds. Interpolated stopping boundaries—z-score critical values for the 3-look design.

Table S1. Study Procedures.

| Table S1. Study Procedure (detail)                                                                      |                     |           |                |               |              |               |
|---------------------------------------------------------------------------------------------------------|---------------------|-----------|----------------|---------------|--------------|---------------|
| Activity                                                                                                | Telephone Screening | Screening | Baseline Visit | Randomization | Intervention | 6 Month Visit |
| <b>Study Team Procedures</b>                                                                            |                     |           |                |               |              |               |
| Consent                                                                                                 |                     | X         | X              |               |              |               |
| Medical History                                                                                         |                     | X         | X              |               |              |               |
| Physical Exam                                                                                           |                     | X         | X              |               |              | X             |
| Height/Weight                                                                                           |                     | X         | X              |               |              | X             |
| Vital signs                                                                                             |                     | X         | X              |               |              | X             |
| Fasting Visit (8-12 hrs)                                                                                |                     |           | X              |               |              | X             |
| Food Frequency Questionnaire                                                                            |                     | X         |                |               |              | X             |
| Study Intervention Information                                                                          | X                   | X         | X              | X             | X            | X             |
| Subject Survey                                                                                          |                     | X         | X              |               |              | X             |
| Deliver/Collect Questionnaires                                                                          |                     | X         | X              |               |              | X             |
| Telephone Communication                                                                                 | X                   |           |                | X             | X            |               |
| Electrocardiogram                                                                                       |                     |           | X              |               |              | X             |
| Pulse Wave Velocity                                                                                     |                     |           | X              |               |              | X             |
| <b>Laboratory Assessments</b>                                                                           |                     |           |                |               |              |               |
| Chemistry/Lipid/Hepatic Panels                                                                          |                     |           | X              |               |              | X             |
| Genomics/Microbiomics                                                                                   |                     |           | X              |               |              | X             |
| CBC with differential                                                                                   |                     |           | X              |               |              | X             |
| <b>Respiratory Assessments</b>                                                                          |                     |           |                |               |              |               |
| FE <sub>NO</sub> testing                                                                                |                     |           | X              |               |              | X             |
| Spirometry                                                                                              |                     |           | X              |               |              | X             |
| <b>Abbreviations: CBC</b> Complete Blood Count; <b>FE<sub>NO</sub></b> Fractional Exhaled Nitric Oxide; |                     |           |                |               |              |               |
